# Supplementary material for: Intestinal ultrasound for monitoring therapeutic response in patients with ulcerative colitis: results from the TRUST&UC study
Source: PubMed Central journal article supplement — Gut. 2019 Dec 20;69(9):1629–36. doi: 10.1136/gutjnl-2019-319451 (PMC7456734; doi:10.1136/gutjnl-2019-319451), 2019-12-20
Supplement: gutjnl-2019-319451supp001.pdf [file gutjnl-2019-319451supp001.pdf]

**Table S1:** BWT [mm] of clinical responders (yes) and non-responders (no) at T2 (n=178) and change in BWT [mm] between T2 and baseline. Valid indicates the number of patients with valid BWT measurements.

**Table S1 BWT [mm] of clinical responders (yes) and non-responders (no) at T2 (n = 178) and change in BWT [mm] between T2 and baseline**

| Parameter                                                           | N     |         | Mean | SD   | Min.  | Max.  | Percentile |        |      |
|---------------------------------------------------------------------|-------|---------|------|------|-------|-------|------------|--------|------|
|                                                                     | valid | invalid |      |      |       |       | 25         | Median | 75   |
| <b>Baseline - colon sigmoideum (p = 0.004)*</b>                     |       |         |      |      |       |       |            |        |      |
| Total (n = 178)                                                     | 174   | 4       | 5.55 | 1.31 | 2.50  | 10.00 | 4.70       | 5.20   | 6.20 |
| Yes (n = 145)                                                       | 141   | 4       | 5.60 | 1.36 | 2.50  | 10.00 | 4.70       | 5.30   | 6.40 |
| No (n = 33)                                                         | 33    | 0       | 5.30 | 1.03 | 3.60  | 8.40  | 4.70       | 5.00   | 5.60 |
| <b>Baseline - colon descendens (p = 0.011)*</b>                     |       |         |      |      |       |       |            |        |      |
| Total (n = 178)                                                     | 160   | 18      | 5.11 | 1.77 | 1.10  | 11.00 | 3.90       | 5.00   | 6.00 |
| Yes (n = 145)                                                       | 131   | 14      | 5.21 | 1.81 | 1.10  | 11.00 | 4.00       | 5.00   | 6.00 |
| No (n = 33)                                                         | 29    | 4       | 4.66 | 1.50 | 1.60  | 7.30  | 3.50       | 4.80   | 5.70 |
| <b>Week 12 - colon sigmoideum (p &lt; 0.001)*</b>                   |       |         |      |      |       |       |            |        |      |
| Total (n = 178)                                                     | 141   | 37      | 3.92 | 1.60 | 1.40  | 9.80  | 2.80       | 3.70   | 4.80 |
| Yes (n = 145)                                                       | 112   | 33      | 3.68 | 1.62 | 1.40  | 9.80  | 2.60       | 3.35   | 4.55 |
| No (n = 33)                                                         | 29    | 4       | 4.84 | 1.17 | 2.50  | 7.00  | 4.10       | 4.60   | 5.90 |
| <b>Week 12 - colon descendens (p &lt; 0.001)*</b>                   |       |         |      |      |       |       |            |        |      |
| Total (n = 178)                                                     | 116   | 62      | 3.74 | 1.63 | 1.00  | 10.1  | 2.50       | 3.60   | 4.50 |
| Yes (n = 145)                                                       | 92    | 53      | 3.52 | 1.72 | 1.00  | 10.1  | 2.30       | 3.00   | 4.35 |
| No (n = 33)                                                         | 24    | 9       | 4.57 | 0.87 | 2.70  | 7.00  | 4.00       | 4.50   | 5.10 |
| <b>Change baseline - week 12 - colon sigmoideum (p &lt; 0.001)*</b> |       |         |      |      |       |       |            |        |      |
| Total (n = 178)                                                     | 140   | 38      | 1.59 | 1.82 | -5.00 | 6.00  | 0.55       | 1.65   | 2.70 |
| Yes (n = 145)                                                       | 111   | 34      | 1.89 | 1.84 | -5.00 | 6.00  | 0.85       | 1.90   | 3.00 |
| No (n = 33)                                                         | 29    | 4       | 0.43 | 1.23 | -2.00 | 2.70  | -0.30      | 0.30   | 1.30 |
| <b>Change baseline - week 12 - colon descendens (p &lt; 0.001)*</b> |       |         |      |      |       |       |            |        |      |
| Total (n = 178)                                                     | 114   | 64      | 1.44 | 2.31 | -5.30 | 9.00  | 0          | 1.15   | 2.70 |
| Yes (n = 145)                                                       | 90    | 55      | 1.79 | 2.39 | -5.30 | 9.00  | 0.50       | 1.65   | 3.20 |
| No (n = 33)                                                         | 24    | 9       | 0.09 | 1.30 | -2.10 | 2.80  | -0.75      | -0.10  | 0.65 |

\* Mann-Whitney U Test

**Table S2:** Distributions of BWT [mm] and of change in BWT [mm] for baseline (n=224), week 6 (n=189) and week 12 (n=178). Valid indicates the number of patients with valid BWT measurements at each visit.

**Table S2 Distributions of BWT [mm] and of changes in BWT [mm] (n = 224)**

| Parameter                                              | N     |         | Mean | SD   | Min. | Max.  | Percentile |        |      |
|--------------------------------------------------------|-------|---------|------|------|------|-------|------------|--------|------|
|                                                        | valid | invalid |      |      |      |       | 25         | Median | 75   |
| <b>BWT baseline - colon sigmoideum</b>                 |       |         |      |      |      |       |            |        |      |
| mITT (n = 224)                                         | 218   | 6       | 5.53 | 1.36 | 2.50 | 10.0  | 4.60       | 5.05   | 6.20 |
| <b>BWT week 6 - colon sigmoideum</b>                   |       |         |      |      |      |       |            |        |      |
| Total (n = 189)                                        | 156   | 33      | 4.01 | 1.47 | 0.28 | 8.00  | 3.00       | 4.00   | 5.00 |
| <b>BWT week 12 - colon sigmoideum</b>                  |       |         |      |      |      |       |            |        |      |
| Total (n = 178)                                        | 140   | 38      | 3.92 | 1.61 | 1.40 | 9.80  | 2.75       | 3.75   | 4.85 |
| <b>BWT baseline - colon descendens</b>                 |       |         |      |      |      |       |            |        |      |
| mITT (n = 224)                                         | 198   | 26      | 5.09 | 1.74 | 1.00 | 11.00 | 4.00       | 5.00   | 6.00 |
| <b>BWT week 6 - colon descendens</b>                   |       |         |      |      |      |       |            |        |      |
| Total (n = 189)                                        | 137   | 52      | 3.55 | 1.42 | 0.22 | 10.1  | 2.50       | 3.50   | 4.50 |
| <b>BWT week 12 - colon descendens</b>                  |       |         |      |      |      |       |            |        |      |
| Total (n = 178)                                        | 115   | 63      | 3.74 | 1.64 | 1.00 | 10.1  | 2.50       | 3.60   | 4.50 |
| <b>Change BWT baseline – week 6- colon sigmoideum</b>  |       |         |      |      |      |       |            |        |      |
| mITT (n = 189)                                         | 122   | 67      | 2.08 | 1.42 | 0.10 | 6.00  | 1.00       | 1.80   | 3.00 |
| <b>Change BWT baseline – week 12- colon sigmoideum</b> |       |         |      |      |      |       |            |        |      |
| Total (n = 178)                                        | 117   | 61      | 2.12 | 1.39 | 0.10 | 6.00  | 1.00       | 2.00   | 3.00 |
| <b>Change BWT baseline – week 6- colon descendens</b>  |       |         |      |      |      |       |            |        |      |
| mITT (n = 189)                                         | 109   | 80      | 2.31 | 1.87 | 0.10 | 9.00  | 0.90       | 2.00   | 3.30 |
| <b>Change BWT baseline – week 12- colon descendens</b> |       |         |      |      |      |       |            |        |      |
| Total (n = 178)                                        | 83    | 95      | 2.35 | 1.87 | 0.10 | 9.00  | 1.00       | 2.00   | 3.50 |

\* Mann-Whitney U Test

**Figure S3.** Distribution of patients with increased BWT in the sigmoid colon (A) or descending colon (B) and the respective grouped Mayo-subscore for an interval between the colonoscopy date and the visit of  $\pm 7$  days (Fisher's exact test).

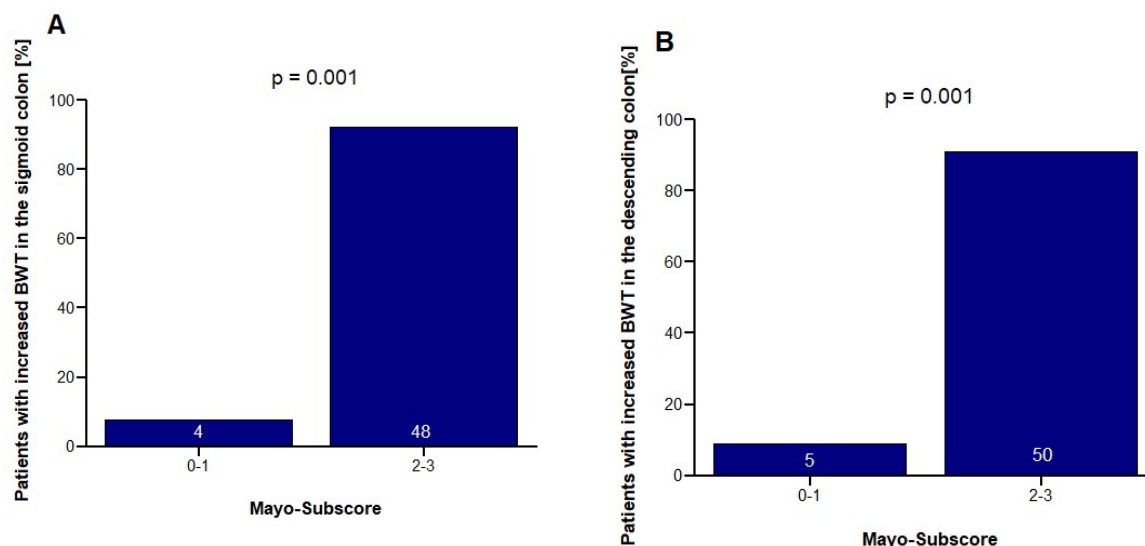

**Table S4:** Results of the correlation analysis between BWT [mm] and SCCAI for each study visit T0, T1, T2 and of the correlation analysis between changes in BWT [mm] and changes in SCCAI.

**Table S4 Correlation between BWT [mm] and SCCAI and between changes of BWT [mm] and changes of SCCAI**

| Parameter 1    | Parameter 2                        | Visit   | n   | $r_{\text{Spearman}}$ |
|----------------|------------------------------------|---------|-----|-----------------------|
| SCCAI          | BWT Colon sigmoideum [mm]          | T0      | 218 | 0,187                 |
|                |                                    | T1      | 156 | 0,432                 |
|                |                                    | T2      | 140 | 0,547                 |
|                | BWT Colon descendens [mm]          | T0      | 198 | 0,262                 |
|                |                                    | T1      | 137 | 0,303                 |
|                |                                    | T2      | 115 | 0,500                 |
| <b>Changes</b> |                                    |         |     |                       |
| $\Delta$ SCCAI | $\Delta$ BWT Colon sigmoideum [mm] | T0 – T1 | 155 | 0,424                 |
|                |                                    | T0 – T2 | 139 | 0,509                 |
|                | $\Delta$ BWT Colon descendens [mm] | T0 – T1 | 135 | 0,343                 |
|                |                                    | T0 – T2 | 113 | 0,571                 |
